# Supplementary material for: Anion exchange induced tunable catalysis properties of an uncommon butterfly-like tetranuclear copper(ii) cluster and magnetic characterization
Source: Royal Society of Chemistry journal article supplement (doi:10.1039/c0dt01220c), 2011-01-01
Supplement: c0dt01220c.pdf [file c0dt01220c.pdf]

## Anion Exchange Induced Tunable Catalysis Properties of an Uncommon Butterfly-like Tetranuclear Copper(II) Cluster and Magnetic Characterization

Wen-Juan Chu, Hong-Chang Yao, Yao-Ting Fan\*, Hong-Wei Hou

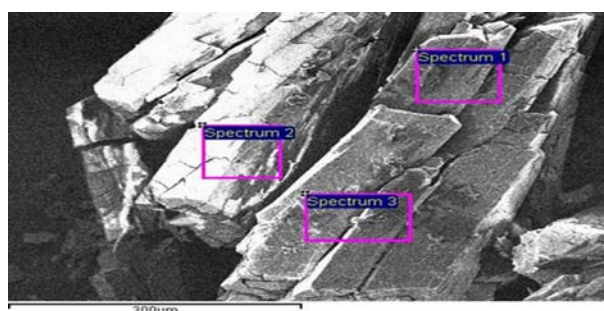

**a**

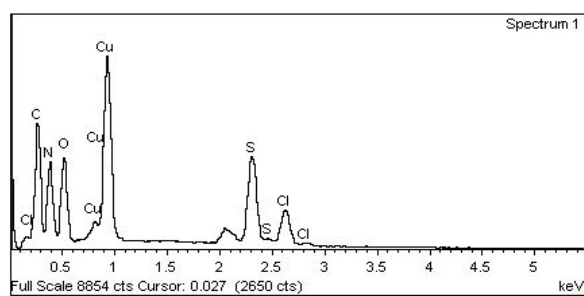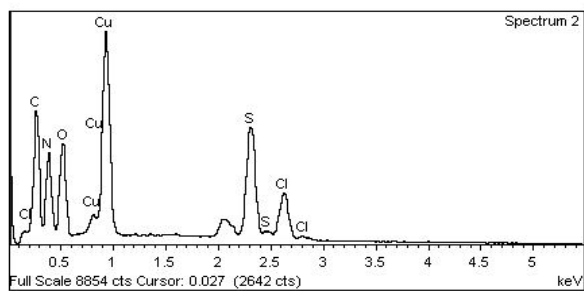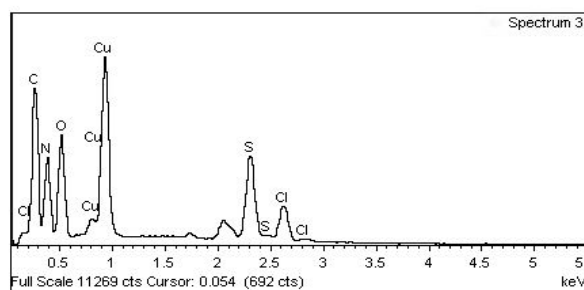

**b**

Figure S1 a) SEM and b) EDS of the compound 1

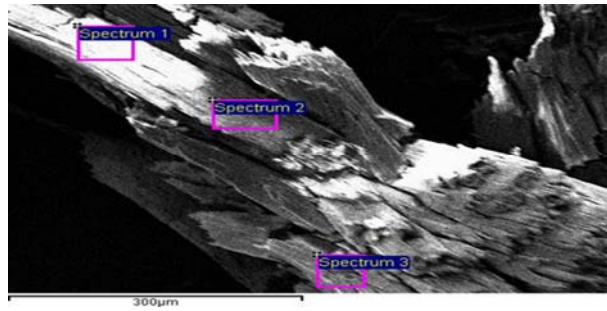

**a**

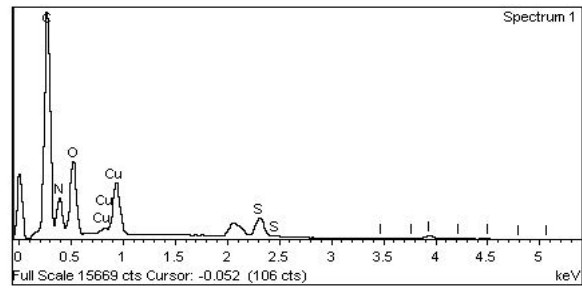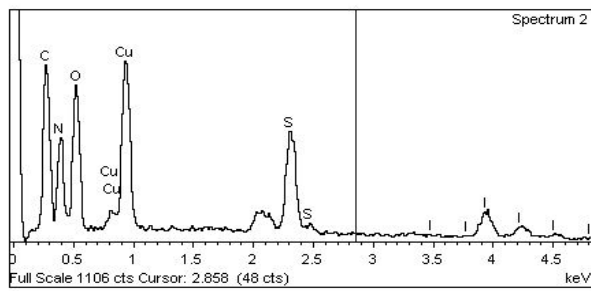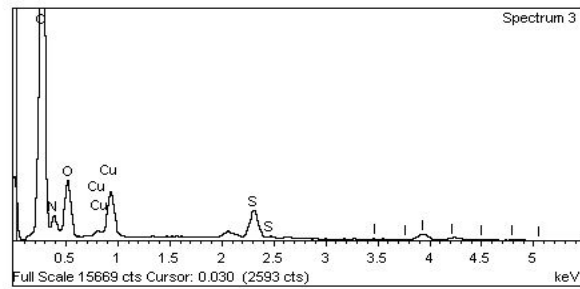

**b**

Figure S2 a) SEM and b) EDS of the anion-exchange product 1-Mix

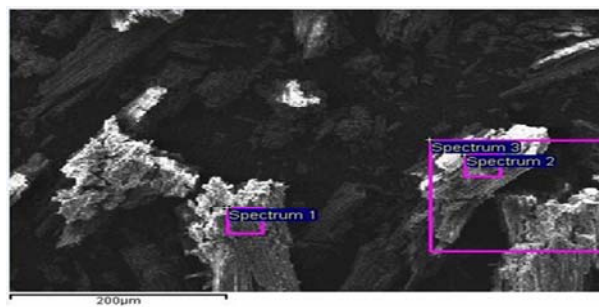

a

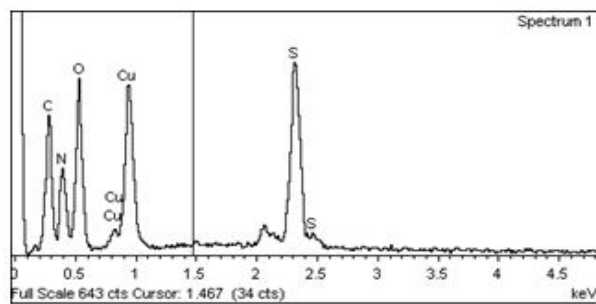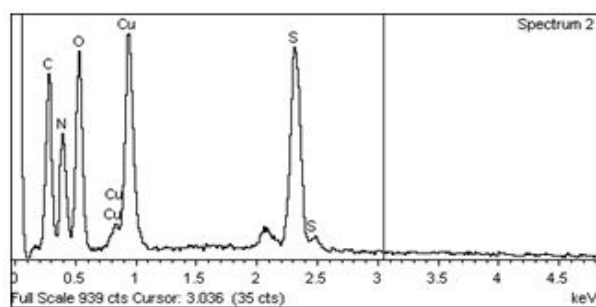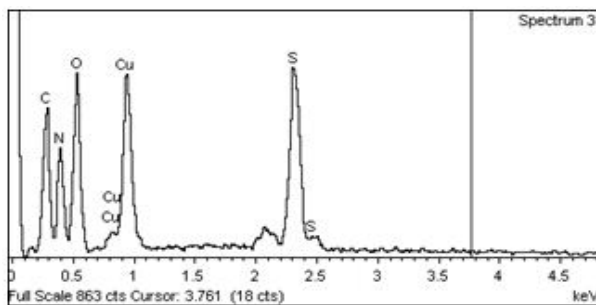

b

Figure S3 a) SEM and b) EDS of the anion-exchanged product 1-MNO<sub>3</sub>x

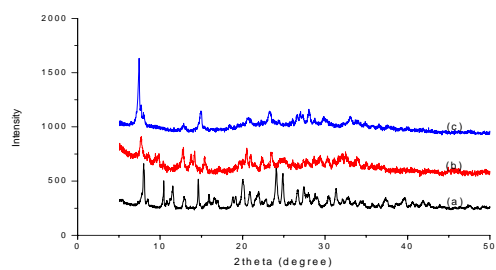

Figure S4 Powder XRD patterns: a) experimental pattern of **1**; b) experimental pattern of its ion-exchanged products obtained by immersing **1** in KI solution; c) experimental pattern of its ion-exchanged products obtained by immersing **1** in  $\text{NaNO}_3$  solution.

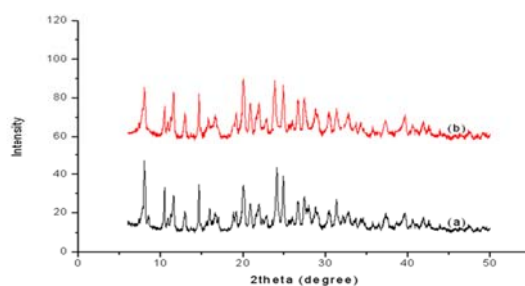

Figure S5 Powder XRD patterns: a) experimental pattern of **1**; b) experimental pattern of compound **1** after catalysis by reprecipitation.
